# Supplementary material for: Inhibition of the Heat Shock Protein A (HSPA) Family Potentiates the Anticancer Effects of Manumycin A
Source: MDPI journal article supplement (doi:10.3390/cells10061418), 2021-06-07
Supplement: s1 [file s1]

**Table S1. List of antibodies used in Western blot analyses**

|                                           | <b>Host /<br/>Clonality</b> | <b>Clone</b> | <b>Catalog Numer /<br/>RRID</b> | <b>Source</b>                                     | <b>Dilution<br/>WB</b> |
|-------------------------------------------|-----------------------------|--------------|---------------------------------|---------------------------------------------------|------------------------|
| <b>FT-<math>\alpha</math></b>             | Mo/M                        | D-5          | sc-374262 /<br>AB_10989066      | Santa Cruz Biotechnology,<br>Inc., Dallas, USA    | 1:1000                 |
| <b>FT-<math>\beta</math></b>              | Mo/M                        | B-7          | sc-46664 /<br>AB_669044         | Santa Cruz Biotechnology,<br>Inc., Dallas, USA    | 1:1000                 |
| <b>panRas</b>                             | Mo/M                        | C-4          | sc-166691 /<br>AB_2154229       | Santa Cruz Biotechnology,<br>Inc., Dallas, USA    | 1:1000                 |
| <b>Sp1</b>                                | Mo/M                        | E-3          | sc-17824 /<br>AB_628272         | Santa Cruz Biotechnology,<br>Inc., Dallas, USA    | 1:1000                 |
| <b>HSPA1</b>                              | Mo/M                        | C92F3A-5     | ADI-SPA-810-F /<br>AB_311860    | Enzo, Life Sciences, Famingdale,<br>NY, USA       | 1:5000                 |
| <b>HSPA2</b>                              | Ra/M                        | EPR4596      | Ab108416 /<br>AB_10862351       | Abcam, Cambridge, UK                              | 1:5000                 |
| <b>HSPA5</b>                              | Mo/M                        | A-10         | Sc-376768 /<br>AB_2819145       | Santa Cruz Biotechnology,<br>Inc., Dallas, USA    | 1:1000                 |
| <b>HSPA6</b>                              | Mo/M                        | 165f         | ADI-SPA-754 /<br>AB_10615942    | Enzo, Life Sciences,<br>Famingdale, NY            | 1:3000                 |
| <b>HSPA8</b>                              | Mo/mAb                      | B-6          | sc-7298 /<br>AB_627761          | Santa Cruz Biotechnology Inc.,<br>Dallas, TX, USA | 1:7500                 |
| <b>HSPA9</b>                              | Mo/M                        | D-9          | Sc-133137 /<br>AB_2120468       | Santa Cruz Biotechnology,<br>Inc., Dallas, USA    | 1:2000                 |
| <b>HSF1</b>                               | Ra/P                        | -            | ADI-SPA-901 /<br>AB_10616511    | Enzo, Life Sciences,<br>Famingdale, NY, USA       | 1:2000                 |
| <b>Phospho<br/>HSF1<br/>(S326)</b>        | Ra/M                        | EP1713Y      | EP1713Y /<br>AB_1267208         | Abcam, Cambridge, UK                              | 1:3000                 |
| <b><math>\beta</math>-actin<br/>(HRP)</b> | Mo/M                        | AC15         | A3854 /<br>AB_262011            | Merck KGaA, Darmstadt,<br>Germany                 | 1:20000                |
| <b>Secondary</b>                          |                             |              |                                 |                                                   |                        |
| <b>Anti-Mo<br/>IgG (HRP)</b>              | Go/P                        | -            | AP124P /<br>AB_90456            | Millipore, Billerica, MA, USA                     | 1:5000                 |
| <b>Anti-Ra<br/>IgG (HRP)</b>              | Go/P                        | -            | AP132P /<br>AB_90264            | Millipore, Billerica, MA, USA                     | 1:2000                 |

Abbreviations: RRID, Research Resource Identifier; M, monoclonal; P, polyclonal; Mo, mouse; nd, no data; Ra, Rabbit; Go, Goat; HRP, horseradish peroxidase

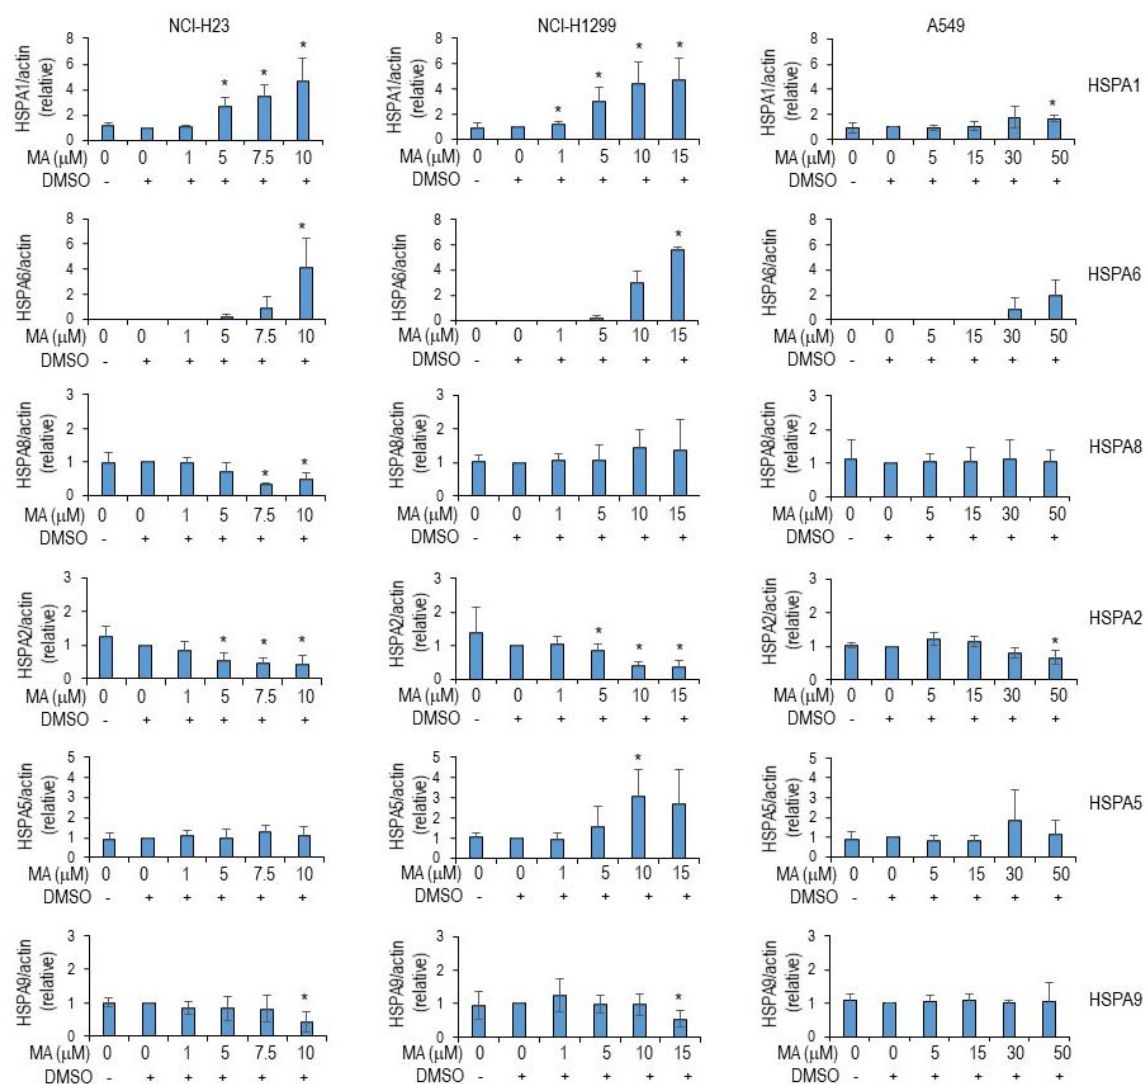

**Figure S1. Effects of manumycin (MA) on the protein levels of HSPA paralogs.** Densitometric analysis of immunoblots that were showed in Figure 2a was performed using ImageJ Software. Each graph shows results (mean  $\pm$  SD) generated from at least three independent immunoblots. The relative protein level is shown after normalization to reporter protein level (actin), in case of HSPA6 as HSPA6/actin ratio. Statistical significance was calculated in relation to cells exposed to DMSO (Dimethyl Sulfoxide) solvent.

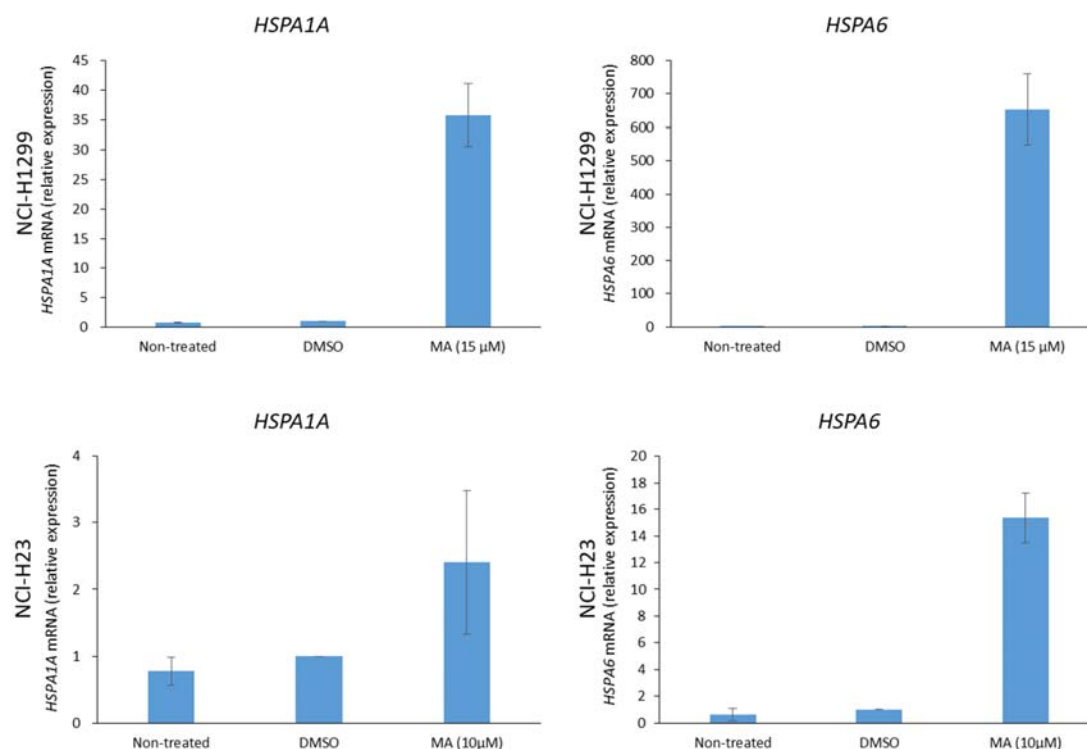

**Figure S2. Effects of MA treatment on the mRNA expression levels of *HSPA1A* and *HSPA6* genes in lung cancer cells assessed by RT-qPCR.** Cells were exposed to MA for 24 h, cells were harvested and total RNA was isolated using Nucleospin RNA Plus kit (Macherey-Nagel, Germany) according to manufacturer's protocol. cDNA synthesis and RT-qPCR reactions were performed according to our standard protocols [20]. Exemplary result (out of two independent repeats) showing relative increase in mRNA expression is shown. Relative expression was calculated using the  $2^{(-\Delta\Delta Ct)}$  method and normalized to the reference index, obtained by calculating the geometric mean of *RPL13A* and *B2M* reference gene expression. Sequences of gene-specific starters are as follows: *HSPA1A\_F*, 5' AGCTGGAGCAGGTGTGTAACCC 3'; *HSPA1A\_R*, 5' AAAAACAGCAATCTTGGAAGGCC 3'; *HSPA6\_F*, 5' TCCTGCCCTTCAGAGATGAACT 3'; *HSPA6\_R*, 5' AAGAGGATGAACCGCCCTCC 3'; *RPL13A\_F*, 5' CCCTACGACAAGAAAAAGCGG 3'; *RPL13A\_R*, 5' TCCGGTAGTGGATCTTGGCT 3'; *B2M\_F*, 5' CTGGGTTTCATCCATCCGACA 3'; *B2M\_R*, 5' GTCTCGATCCCCTTAACCTATCTTGG 3'.

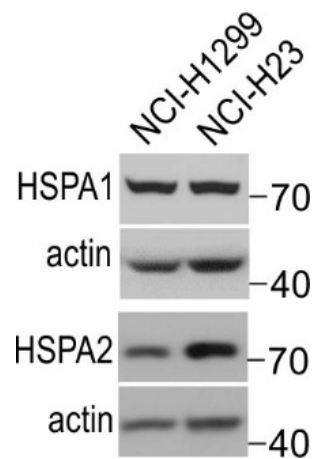

**Figure S3. The basal levels of HSPA1 and HSPA2 protein in NSCLC cell lines.** Total protein extracts were blotted and detected using respective primary antibody (as indicated in Table S1). Representative immunoblots are shown ( $n \geq 3$ ) and actin was used as a protein loading control. The numbers on the right side of immunoblots indicate molecular weight of the protein size marker.

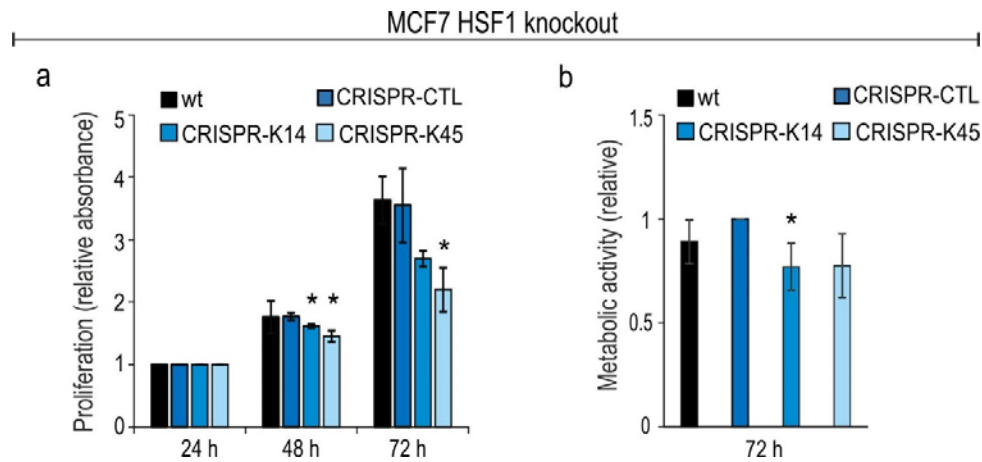

**Figure S4. Effects of HSF1 knockout on the proliferation of MCF7 cells.** (a) Cell proliferation at 24, 48, 72 hours (h) was determined by the crystal violet staining assay. Cells ( $2 \times 10^4$  cells per well) were seeded and cultured in 12-well plates. At the indicated time cells were washed with PBS, fixed in cold methanol, and rinsed with distilled water. Cells were stained with 0.1% crystal violet for 30 min, rinsed with distilled water extensively, and dried. Cell-associated dye was extracted with 1 ml of 10% acetic acid. Aliquots (200  $\mu$ l) were transferred to a 96-well plate and the absorbance was measured at 595 nm (Synergy2, BioTek). Values were normalized to the optical density at the 24 h time point; all experiments were performed in triplicate at least. (b) Metabolic activity was assessed by MTS assay after 72 h of continuous cell growth under standard culture conditions. Results (mean  $\pm$  SD,  $n = 3$ , each in three technical repeats) are expressed relatively to control (CRISPR-CTL).
